# Supplementary material
Source: publisher site journal article supplement (http://static.cambridge.org/content/id/urn:cambridge.org:id:article:S1047951119002786/resource/name/S1047951119002786supp001.docx)
Supplement: Supplementary file 1 [file S1047951119002786supp001.docx]

**Supplementary Material**

Supplementary Table S1. Primary procedures

| **Primary Procedure** | **N** | **Percentage** |
| --- | --- | --- |
| Aortic Aneurysm Repair | 1 | 0.12 |
| Aortic Valve Disease Repair | 21 | 2.62 |
| AP Window Repair | 1 | 0.12 |
| ASD Repair | 56 | 7.00 |
| AV Canal Repair | 52 | 6.50 |
| Cardiac Tumor Resection | 1 | 0.12 |
| Coarctation of Aorta and Aortic Arch Hypoplasia Repair | 63 | 7.88 |
| Conduit Operation | 1 | 0.12 |
| Conduit Reoperation | 13 | 1.62 |
| Cor Triatriatum Repair | 1 | 0.12 |
| Coronary Artery Anomaly Repair | 8 | 1.00 |
| Damus-Kaye-Stansel Procedure | 2 | 0.25 |
| DORV Repair | 4 | 0.50 |
| Fontan Procedure | 38 | 4.75 |
| Heart Transplant | 14 | 1.75 |
| Hybrid Catheterization Approach | 1 | 0.12 |
| Hybrid Stage 1 | 5 | 0.62 |
| Hypoplastic Left Heart and Related Malformations Procedure | 1 | 0.12 |
| ICD Procedure | 4 | 0.50 |
| Interrupted Aortic Arch Repair | 4 | 0.50 |
| Kawashima Procedure | 1 | 0.12 |
| Mitral Valve Disease Repair | 12 | 1.50 |
| PA Banding/Debanding | 30 | 3.75 |
| Pacemaker Procedure | 31 | 3.88 |
| Partial Anomalous Pulmonary Venous Connection | 9 | 1.12 |
| PDA Closure | 70 | 8.75 |
| Pericardial Disease Procedure | 7 | 0.88 |
| Pulmonary Artery Ligation | 1 | 0.12 |
| Pulmonary Atresia/VSD Repair | 9 | 1.12 |
| Pulmonary Embolectomy | 1 | 0.12 |
| Pulmonary Valve Disease Repair | 32 | 4.00 |
| Pulmonary Venous Stenosis Repair | 5 | 0.62 |
| RVOT Obstruction, IVS Pulmonary Stenosis Repair | 24 | 3.00 |
| Shunt Procedure | 31 | 3.88 |
| Sinus of Valsalva Aneurysm Repair | 1 | 0.12 |
| Stage 1 Palliation | 25 | 3.12 |
| Stage 2 Palliation | 32 | 4.00 |
| Tetralogy of Fallot | 55 | 6.88 |
| Total Anomalous Pulmonary Venous Connection Repair | 15 | 1.88 |
| Transposition of the Great Arteries Repair | 28 | 3.50 |
| Tricuspid Valve Disease and Ebstein’s Anomaly Repair | 10 | 1.25 |
| Truncus Arteriosus Repair | 4 | 0.50 |
| Vascular Rings and Slings Repair | 11 | 1.38 |
| Ventricular Aneurysm Repair | 1 | 0.12 |
| VSD Repair | 61 | 7.62 |
| NA | 3 | 0.38 |

Abbreviations: AP Window, Aortopulmonary Window; ASD, Atrial Septal Defect; AV Canal, Atrioventricular Canal; DORV, Double Outlet Right Ventricle; ICD, Implantable Cardioverter Defibrillator; PA, Pulmonary Artery; PDA, Patent Ductus Arteriosus; VSD, Ventricular Septal Defect; RVOT, Right Ventricular Outflow Tract; IVS, Intact Ventricular Septum

Supplementary Table S2. Fundamental diagnoses

| **Fundamental Diagnosis** | **N** | **Percentage** |
| --- | --- | --- |
| Aortic Valve Disease | 15 | 1.88 |
| AP Window | 2 | 0.25 |
| Arrhythmia | 20 | 2.50 |
| ASD | 43 | 5.38 |
| AV Canal | 71 | 8.88 |
| Cardiac Tumor | 1 | 0.12 |
| Cardiomyopathy | 9 | 1.12 |
| Coarctation of Aorta and Aortic Arch Hypoplasia | 65 | 8.12 |
| Congenitally Corrected TGA | 3 | 0.38 |
| Cor Triatriatum | 1 | 0.12 |
| Coronary Artery Anomalies | 11 | 1.38 |
| DOLV | 1 | 0.12 |
| DORV | 19 | 2.38 |
| Endocarditis | 1 | 0.12 |
| Hypoplastic Left Heart Syndrome | 55 | 6.88 |
| Hypoplastic RV | 1 | 0.12 |
| Interrupted Aortic Arch | 4 | 0.50 |
| Mitral Valve Disease | 8 | 1.00 |
| Partial Anomalous Pulmonary Venous Connection | 10 | 1.25 |
| Patent Ductus Arteriosus | 63 | 7.88 |
| Pericardial Disease | 6 | 0.75 |
| Pulmonary Atresia | 50 | 6.25 |
| Pulmonary Embolism | 1 | 0.12 |
| Pulmonary Valve Disease | 3 | 0.38 |
| RVOT Obstruction and/or Pulmonary Stenosis | 11 | 1.38 |
| Single Ventricle | 72 | 9.00 |
| Sinus of Valsalva Aneurysm/Fistula | 1 | 0.12 |
| Tetralogy of Fallot | 85 | 10.62 |
| Total Anomalous Pulmonary Venous Connection | 18 | 2.25 |
| Transposition of the Great Arteries | 30 | 3.75 |
| Tricuspid Valve Disease and Ebstein’s Anomaly | 11 | 1.38 |
| Truncus Arteriosus | 8 | 1.00 |
| Vascular Rings and Slings | 11 | 1.38 |
| Ventricular Aneurysm | 1 | 0.12 |
| VSD | 87 | 10.88 |
| NA | 2 | 0.25 |

Abbreviations: AP Window, Aortopulmonary Window; ASD, Atrial Septal Defect; AV Canal, Atrioventricular Canal; TGA, Transposition of the Great Arteries, DOLV, Double Outlet Left Ventricle; DORV, Double Outlet Right Ventricle; RV, Right Ventricle; RVOT, Right Ventricular Outflow Tract; VSD, Ventricular Septal Defect
